# Supplementary material for: MicroRNA205: A Key Regulator of Cardiomyocyte Transition from Proliferative to Hypertrophic Growth in the Neonatal Heart
Source: MDPI journal article supplement (doi:10.3390/ijms25042206), 2024-02-12
Supplement: s1 [file s1]

Supplemental Table S1. Antibody Information List

| <b>Antibody</b> | <b>Vendor</b>  | <b>Catalogue Number</b> | <b>Dilution*</b>      |
|-----------------|----------------|-------------------------|-----------------------|
| CDK1            | Santa Cruz     | 8395                    | WB: 1/1000            |
| pCDK1           | Santa Cruz     | 136014                  | WB: 1/1000            |
| Dicer           | Cell Signaling | 5325                    | WB: 1/1000            |
| GAPDH           | Thermo Fisher  | AM4300                  | WB: 1/1000            |
| Ki67            | Cell Signaling | 9027                    | IHC: 1/400            |
| Lats1           | Cell Signaling | 3477                    | WB: 1/1000            |
| alphaMHC        | Abcam          | 50967                   | WB: 1/1000            |
| Mob1            | Cell Signaling | 13730                   | WB: 1/1000            |
| pMob1           | Cell Signaling | 8699                    | WB: 1/1000            |
| Mst1            | Cell Signaling | 3682                    | WB: 1/1000            |
| pH3             | Cell Signaling | 9701                    | IHC: 1/200            |
| PTEN            | Cell Signaling | 9188                    | WB: 1/1000            |
| pPTEN           | Cell Signaling | 9551                    | WB: 1/1000            |
| Rb              | Cell Signaling | 9309                    | WB: 1/1000            |
| pRb             | Cell Signaling | 9307                    | WB: 1/1000            |
| Sav1            | Cell Signaling | 13301                   | WB: 1/1000            |
| Yap             | Cell Signaling | 14074                   | WB: 1/1000; IHC 1/200 |
| pYap            | Cell Signaling | 13008                   | WB: 1/1000            |

\*WB = Western Blot; IHC = Immunohistochemistry

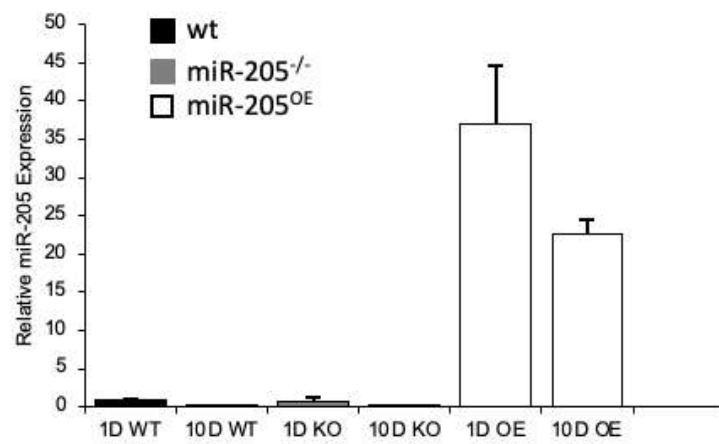

**Supplementary Figure S1.** RT-qPCR of miR205 confirming the up regulation of miR-205 in cardiac tissue in the cardiac-specific miR-205 over expressing mouse model (n=3 hearts per time point) .
